# Supplementary material for: Evaluating Attitudes towards Large Carnivores within the Great Bear Rainforest
Source: MDPI journal article supplement (doi:10.3390/su132313270), 2021-11-30
Supplement: s1 [file s1]

# Evaluating Carnivore Attitudes

*Evaluating attitudes towards large carnivores within the Great Bear Rainforest.*

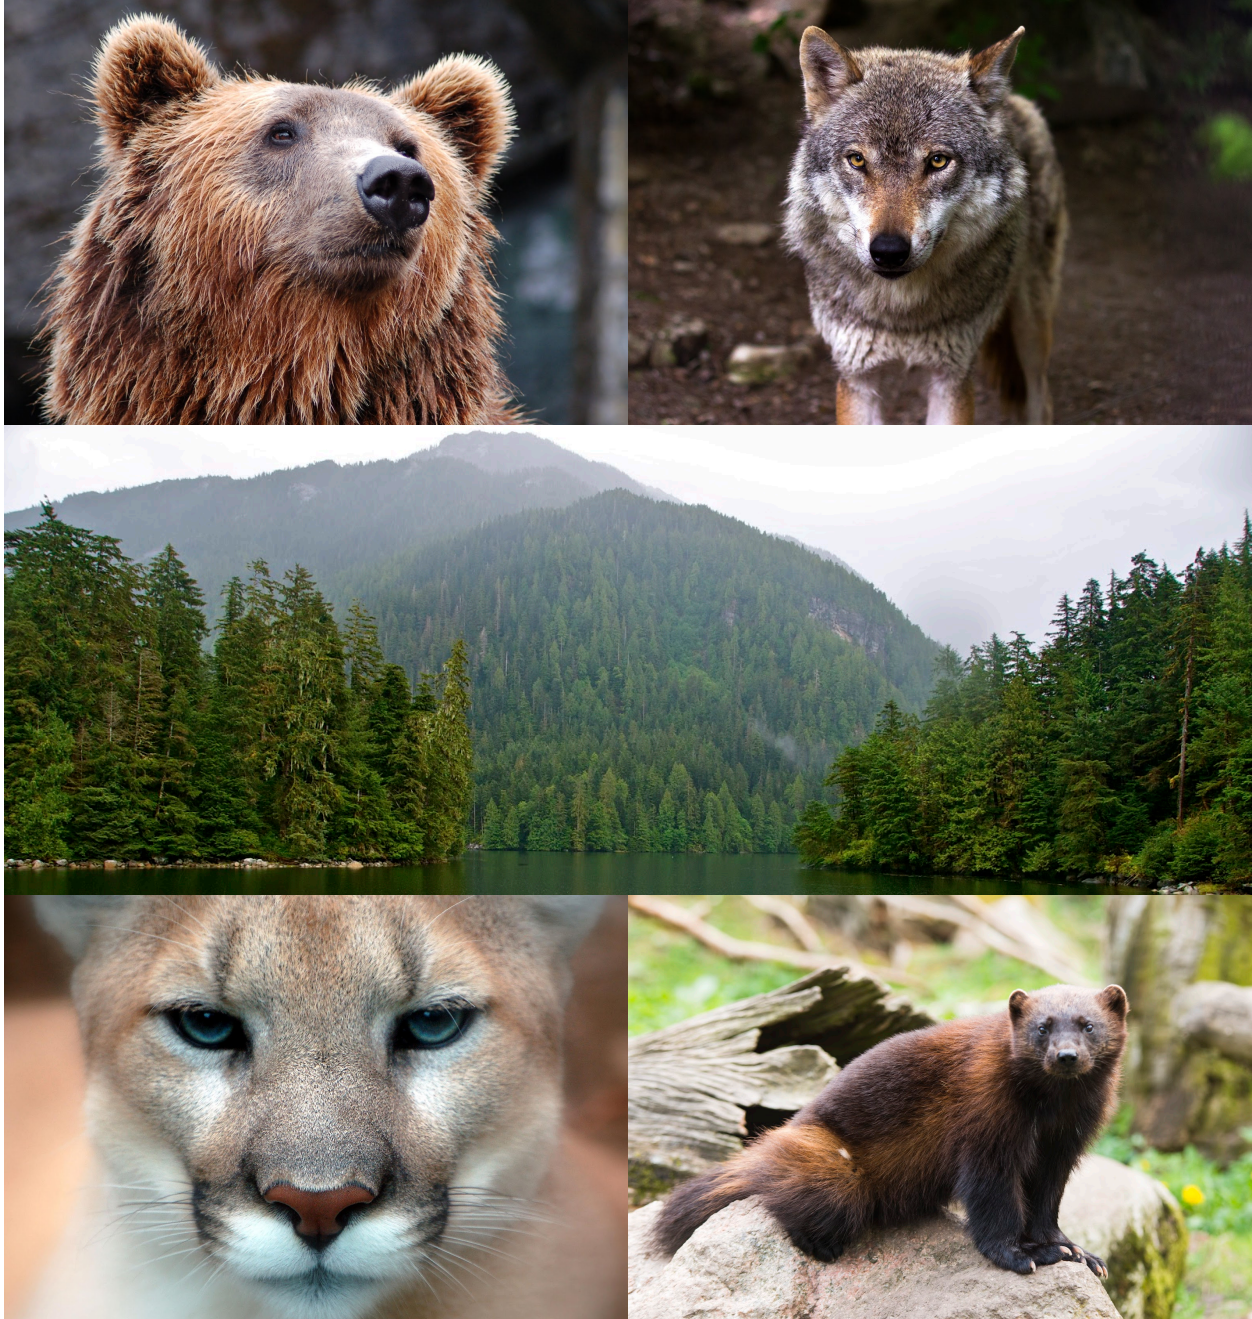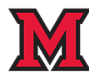

MIAMI UNIVERSITY

OXFORD, OH • EST. 1809

### Research Consent Information

You are invited to participate in a research project being conducted by Max Leveridge, Dr. Amélie Davis, Dr. Sarah Dumyahn and Dr. Ryan Gunderson from the Institute for the Environment and Sustainability at Miami University in Oxford, Ohio. The purpose of this study is to examine your views on the surrounding environment and wildlife. Participation in this research is restricted to persons 19 years of age or older.

The survey and following recorded interview should take between 30 to 40 minutes. Your participation is voluntary, you may skip questions you do not want to answer, and you may stop at any time. Only the people listed above will have access to your responses. Results of the research will be presented publicly only as aggregate summaries. Your consent is required to meet research ethics obligations.

Your name will never be linked to your recordings or responses. The only identifier will be the Unique ID at the bottom of this form, which can also be used to withdraw your responses from the study at any time. All recordings and transcripts will be stored on a secure server that require a username and password to access and that will be available only to the individuals listed above. After the analyses are conducted, the research data will be retained in a secure location for 3 years past publication of the findings (or 7 years if the findings are not published) and then destroyed.

If you have any questions about this research or you feel you need more information after the interview, you can contact Max Leveridge at \_\_\_\_\_ or Dr. Amélie Davis at \_\_\_\_\_

If you have questions or concerns about the rights of research subjects, you may contact our reviewing body: The Research Ethics and Integrity Office at Miami University at +1 (513) 529-3600 or [humansubjects@miamioh.edu](mailto:humansubjects@miamioh.edu). This project's reference number is: **02869e**.

Please keep the second copy of this information and save it for future reference.

Participant Full Name: \_\_\_\_\_

Participant Unique ID: \_\_\_\_\_

Participant Signature: \_\_\_\_\_

First, I have a few questions that are more general. The responses to these questions range from strongly disagree to strongly agree [**Please select one option for each question**]:

|                                                                                                         | Strongly Disagree        | Disagree                 | Neither Agree Nor Disagree | Agree                    | Strongly Agree           |
|---------------------------------------------------------------------------------------------------------|--------------------------|--------------------------|----------------------------|--------------------------|--------------------------|
| <b>1. We are approaching the limit of the number of people the earth can support.</b>                   | <input type="checkbox"/> | <input type="checkbox"/> | <input type="checkbox"/>   | <input type="checkbox"/> | <input type="checkbox"/> |
| <b>2. Humans have the right to modify the natural environment to suit their needs.</b>                  | <input type="checkbox"/> | <input type="checkbox"/> | <input type="checkbox"/>   | <input type="checkbox"/> | <input type="checkbox"/> |
| <b>3. When humans interfere with nature it often produces disastrous consequences.</b>                  | <input type="checkbox"/> | <input type="checkbox"/> | <input type="checkbox"/>   | <input type="checkbox"/> | <input type="checkbox"/> |
| <b>4. Human ingenuity will ensure that we do NOT make the earth unlivable.</b>                          | <input type="checkbox"/> | <input type="checkbox"/> | <input type="checkbox"/>   | <input type="checkbox"/> | <input type="checkbox"/> |
| <b>5. Humans are severely abusing the environment.</b>                                                  | <input type="checkbox"/> | <input type="checkbox"/> | <input type="checkbox"/>   | <input type="checkbox"/> | <input type="checkbox"/> |
| <b>6. The earth has plenty of natural resources if we just learn how to develop them.</b>               | <input type="checkbox"/> | <input type="checkbox"/> | <input type="checkbox"/>   | <input type="checkbox"/> | <input type="checkbox"/> |
| <b>7. Plants and animals have as much right as humans to exist.</b>                                     | <input type="checkbox"/> | <input type="checkbox"/> | <input type="checkbox"/>   | <input type="checkbox"/> | <input type="checkbox"/> |
| <b>8. The balance of nature is strong enough to cope with the impacts of modern industrial nations.</b> | <input type="checkbox"/> | <input type="checkbox"/> | <input type="checkbox"/>   | <input type="checkbox"/> | <input type="checkbox"/> |
| <b>9. Despite our special abilities humans are still subject to the laws of nature.</b>                 | <input type="checkbox"/> | <input type="checkbox"/> | <input type="checkbox"/>   | <input type="checkbox"/> | <input type="checkbox"/> |
| <b>10. The so-called “ecological crisis” facing humankind has been greatly exaggerated.</b>             | <input type="checkbox"/> | <input type="checkbox"/> | <input type="checkbox"/>   | <input type="checkbox"/> | <input type="checkbox"/> |

|                                                                                                                                                       | Strongly Disagree        | Disagree                 | Neither Agree Nor Disagree | Agree                    | Strongly Agree           |
|-------------------------------------------------------------------------------------------------------------------------------------------------------|--------------------------|--------------------------|----------------------------|--------------------------|--------------------------|
| 11. The earth is like a spaceship with very limited room and resources.                                                                               | <input type="checkbox"/> | <input type="checkbox"/> | <input type="checkbox"/>   | <input type="checkbox"/> | <input type="checkbox"/> |
| 12. Humans were meant to rule over the rest of nature.                                                                                                | <input type="checkbox"/> | <input type="checkbox"/> | <input type="checkbox"/>   | <input type="checkbox"/> | <input type="checkbox"/> |
| 13. The balance of nature is very delicate and easily upset.                                                                                          | <input type="checkbox"/> | <input type="checkbox"/> | <input type="checkbox"/>   | <input type="checkbox"/> | <input type="checkbox"/> |
| 14. Humans will eventually learn enough about how nature works to be able to control it.                                                              | <input type="checkbox"/> | <input type="checkbox"/> | <input type="checkbox"/>   | <input type="checkbox"/> | <input type="checkbox"/> |
| 15. If things continue on their present course, we will soon experience a major ecological catastrophe.                                               | <input type="checkbox"/> | <input type="checkbox"/> | <input type="checkbox"/>   | <input type="checkbox"/> | <input type="checkbox"/> |
| 16. How I manage the land, both for plants and animals and for future people, reflects my sense of responsibility to and so stewardship of the land.  | <input type="checkbox"/> | <input type="checkbox"/> | <input type="checkbox"/>   | <input type="checkbox"/> | <input type="checkbox"/> |
| 17. There are landscapes that say something about who we are as a community, a people.                                                                | <input type="checkbox"/> | <input type="checkbox"/> | <input type="checkbox"/>   | <input type="checkbox"/> | <input type="checkbox"/> |
| 18. I often think of some wild places whose fate I care about and strive to protect, even though I may never see them myself.                         | <input type="checkbox"/> | <input type="checkbox"/> | <input type="checkbox"/>   | <input type="checkbox"/> | <input type="checkbox"/> |
| 19. I have strong feelings about nature (including all plants, animals, the land, etc.), and these views are part of who I am and how I live my life. | <input type="checkbox"/> | <input type="checkbox"/> | <input type="checkbox"/>   | <input type="checkbox"/> | <input type="checkbox"/> |

|                                                                                                                                         | Strongly Disagree        | Disagree                 | Neither Agree Nor Disagree | Agree                    | Strongly Agree           |
|-----------------------------------------------------------------------------------------------------------------------------------------|--------------------------|--------------------------|----------------------------|--------------------------|--------------------------|
| <b>20. Plants and animals, as part of the interdependent web of life, are like ‘kin’ or family to me, so how we treat them matters.</b> | <input type="checkbox"/> | <input type="checkbox"/> | <input type="checkbox"/>   | <input type="checkbox"/> | <input type="checkbox"/> |
| <b>21. My health, the health of my family, and the health of others who I care about is dependent on the natural environment.</b>       | <input type="checkbox"/> | <input type="checkbox"/> | <input type="checkbox"/>   | <input type="checkbox"/> | <input type="checkbox"/> |
| <b>22. Humans have a responsibility to account for our own impacts to the environment because they can harm other people.</b>           | <input type="checkbox"/> | <input type="checkbox"/> | <input type="checkbox"/>   | <input type="checkbox"/> | <input type="checkbox"/> |

I have a few additional questions about you.

**23. What types of outdoor activities do you often (several times a year or more) take part in?**

- ☐ Camping  
☐ Fishing  
☐ Hiking  
☐ Hunting  
☐ Other [Specify] \_\_\_\_\_

**24. Have you hunted any carnivores in the past year?**

- ☐ No → **Go to question 25**  
☐ Yes → **If yes - which species and how many of each?**

| <i>Species</i>           | <i>How Many?</i> |
|--------------------------|------------------|
| Wolf                     |                  |
| Black Bear               |                  |
| Grizzly Bear             |                  |
| Cougar                   |                  |
| Wolverine                |                  |
| Other [Specify]<br>_____ |                  |

**25. Do you live within the Great Bear Rainforest?**

- ☐ No  
☐ Yes

**26. What is your postal code?**

|  |  |  |  |  |  |
|--|--|--|--|--|--|
|  |  |  |  |  |  |
|--|--|--|--|--|--|

**27. How long have you lived in this area?** \_\_\_\_\_ years

**28. What is your age?** \_\_\_\_\_ years

**29. Are you: [Mark more than one or specify, if applicable.]**

- ☐ White
- ☐ South Asian (e.g., East Indian, Pakistani, Sri Lankan, etc.)
- ☐ Chinese
- ☐ Black
- ☐ Filipino
- ☐ Latin American
- ☐ Arab
- ☐ Southeast Asian (e.g., Vietnamese, Cambodian, Laotian, Thai, etc.)
- ☐ West Asian (e.g., Iranian, Afghan, etc.)
- ☐ Korean
- ☐ Japanese
- ☐ Other [Specify] \_\_\_\_\_

**30. Are you a member of a First Nation/Indian band? [If "Yes," which First Nation/Indian band?]**

- ☐ No
- ☐ Yes [Specify] \_\_\_\_\_

**31. Please select the highest level of schooling you have completed:**

- ☐ Some high school
- ☐ High school
- ☐ Some college
- ☐ A.A. or equivalent
- ☐ B.A. or equivalent
- ☐ M.A. or equivalent
- ☐ Advanced degree (e.g., M.D., D.V.M., Ph.D., etc.)
- ☐ None of the above

**32. What is your work or occupation? If you currently hold no job, answer for the job of longest duration since January 1, 2016. [Please be specific. For example: general practitioner, fishing guide, civil engineer, secondary school teacher. If in the Armed Forces, give rank.]**

---

**33. What is your gender?**

- ☐ Male
- ☐ Female
- ☐ Prefer not to answer

**34. Which salary range corresponds to your current annual salary?**

- ☐ Less than \$30,000
- ☐ \$30,000 to \$39,999
- ☐ \$40,000 to \$49,999
- ☐ \$50,000 to \$59,999
- ☐ \$60,000 to \$69,999
- ☐ \$70,000 to \$79,999
- ☐ \$80,000 to \$89,999
- ☐ \$90,000 or more
